# Supplementary material
Source: PubMed Central journal article supplement (PMC2977984)
Supplement: NIHMS218108-supplement-Supplementary_data1.pdf [file NIHMS218108-supplement-Supplementary_data1.pdf]

Supplementary information S1 | RefSeq genes located in the most common 3-Mb 22q11.2 microdeletion <sup>a</sup>

| Gene Symbol <sup>b</sup> | Gene Name                                                               | Function Summary                                                                                                                                                                         | Expression in HPC or forebrain <sup>c</sup> | Possible Genetic Link to SCZ (Ref) <sup>d</sup> | Abnormal brain-related phenotypes in mouse models <sup>e</sup>                                                                                                                   |
|--------------------------|-------------------------------------------------------------------------|------------------------------------------------------------------------------------------------------------------------------------------------------------------------------------------|---------------------------------------------|-------------------------------------------------|----------------------------------------------------------------------------------------------------------------------------------------------------------------------------------|
| <i>DGCR6</i>             | DiGeorge syndrome critical region gene 6                                | Shares homology with the <i>Drosophila melanogaster</i> gonadal protein and with the gamma-1 subunit of human laminin.                                                                   | Yes                                         | Yes (1)                                         |                                                                                                                                                                                  |
| <i>PRODH</i>             | Proline dehydrogenase (oxidase) 1                                       | Encodes for the mitochondrial enzyme proline dehydrogenase that catalyzes the first step in the degradation of L-proline, a putative neuromodulator.                                     | Yes                                         | Yes (1, 2)                                      | Altered synaptic transmission, reduced PPI, impaired fear conditioning, altered cortical dopaminergic transmission.                                                              |
| <i>DGCR5</i>             | DiGeorge syndrome critical region gene 5 (non-coding)                   | n/a                                                                                                                                                                                      |                                             |                                                 |                                                                                                                                                                                  |
| <i>DGCR9</i>             | DiGeorge syndrome critical region gene 9                                | n/a                                                                                                                                                                                      |                                             |                                                 |                                                                                                                                                                                  |
| <i>DGCR1</i>             | DiGeorge syndrome critical region gene 1                                | n/a                                                                                                                                                                                      |                                             |                                                 |                                                                                                                                                                                  |
| <i>DGCR2</i>             | KIAA163 gene product                                                    | Encodes a novel putative adhesion receptor protein.                                                                                                                                      | Yes                                         | Yes (3)                                         |                                                                                                                                                                                  |
| <i>DGCR11</i>            | DiGeorge syndrome critical region gene 11                               | n/a                                                                                                                                                                                      |                                             |                                                 |                                                                                                                                                                                  |
| <i>DGCR14</i>            | DiGeorge syndrome critical region gene 14                               | The encoded protein may be a component of splicosomes.                                                                                                                                   | Yes                                         | Yes (4)                                         |                                                                                                                                                                                  |
| <i>TSSK2</i>             | Testis-specific serine kinase 2                                         | Belongs to a family of serine/threonine kinases highly expressed in testis                                                                                                               | Yes                                         |                                                 |                                                                                                                                                                                  |
| <i>GSC2</i>              | Gooseoid-like                                                           | A homeodomain-containing gene, expressed in a limited number of adult tissues and in early development.                                                                                  | Yes                                         |                                                 |                                                                                                                                                                                  |
| <i>SLC25A1</i>           | Solute carrier family 25 (citrate transporter mitochondrial), member 1  | May be involved in the regulation of chromosomal integrity                                                                                                                               | Yes                                         |                                                 |                                                                                                                                                                                  |
| <i>CLTCL1</i>            | Clathrin, heavy polypeptide-like 1                                      | Encodes a major protein of the polyhedral coat of coated pits and vesicles.                                                                                                              |                                             |                                                 |                                                                                                                                                                                  |
| <i>HIRA</i>              | Hir histone cell cycle regulation defective homolog a (s. cerevisiae)   | Encodes a histone chaperone that preferentially places the variant histone H3.3 in nucleosomes. May play a role in the formation of transcriptionally silent heterochromatin.            | Yes                                         |                                                 | Embryonic lethal; abnormal morphology of head, forebrain, neural tube, embryonic neuroepithelium, neural plate and altered hindbrain development.                                |
| <i>MRPL4</i>             | Nuclear localization signal deleted in velocardiofacial syndrome        | Encodes for a mammalian mitochondrial ribosomal protein; controls in protein synthesis within the mitochondrion.                                                                         | Yes                                         |                                                 |                                                                                                                                                                                  |
| <i>C22orf39</i>          | Hypothetical protein flc128977                                          | n/a                                                                                                                                                                                      |                                             |                                                 |                                                                                                                                                                                  |
| <i>UTDIL</i>             | Ubiquitin fusion degradation 1 like (yeast)                             | Encodes a protein necessary for the degradation of ubiquitinated proteins; controls the disassembly of the mitotic spindle and the formation of a closed nuclear envelope after mitosis. | Yes                                         | Yes (5)                                         |                                                                                                                                                                                  |
| <i>CDC45L</i>            | cdc45 cell division cycle 45-like (s. cerevisiae)                       | Highly homologous to the <i>Saccharomyces cerevisiae</i> Cdc45, a protein required to the initiation of DNA replication.                                                                 | Yes                                         | Yes (6)                                         |                                                                                                                                                                                  |
| <i>CLDN5</i>             | Claudin 5                                                               | Encodes a major cell adhesion molecule of tight junctions in brain endothelial cells.                                                                                                    | Yes                                         | Yes (6)                                         | Neonatal lethality; blood-brain barrier against small molecules (<8 D) was selectively affected.                                                                                 |
| <i>LOC15185</i>          | Septin 5                                                                | n/a                                                                                                                                                                                      |                                             |                                                 |                                                                                                                                                                                  |
| <i>SEPT5</i>             | Septin 5                                                                | Member of the septin gene family, which regulates cytoskeletal organization.                                                                                                             | Yes                                         |                                                 | Abnormal anxiety response, reward learning and social/conspicuous interaction, increased startle reflex, and prepulse inhibition, normal neuronal development and transmission.  |
| <i>GP1BB</i>             | Glycoprotein Ib (platelet), beta polypeptide                            | A heterodimeric transmembrane protein that constitutes the receptor for von Willebrand factor, and mediates platelet adhesion.                                                           | Yes                                         |                                                 |                                                                                                                                                                                  |
| <i>TBX1</i>              | T-box 1                                                                 | Member of a family of transcription factors that share a common DNA-binding domain, the T-box.                                                                                           | Yes                                         |                                                 | Decreased prepulse inhibition.                                                                                                                                                   |
| <i>GNB1L</i>             | Guanine nucleotide binding protein (G protein), beta polypeptide 1-like | Encodes a G-protein beta-subunit-like polypeptide with WD repeats.                                                                                                                       | Yes                                         | Yes (7)                                         | Decreased prepulse inhibition.                                                                                                                                                   |
| <i>C22orf29</i>          | Hypothetical protein flj21125                                           | n/a                                                                                                                                                                                      |                                             |                                                 |                                                                                                                                                                                  |
| <i>TXNRD2</i>            | Thioredoxin reductase 2                                                 | A member of a family of pyridine nucleotide-disulfide oxidoreductases and a key enzyme in the regulation of the intracellular redox environment.                                         | Yes                                         |                                                 |                                                                                                                                                                                  |
| <i>COMT</i>              | Catechol-O-methyltransferase                                            | Catalyzes the transfer of a methyl group from S-adenosylmethionine to catecholamines. One of the major degradative pathways of the catecholamine transmitters.                           | Yes                                         | Yes (8-10)                                      | Reduced clearance of cortical dopamine, increased aggression towards males, altered anxiety-related response, cognitive deficits.                                                |
| <i>ARVCF</i>             | Armadillo repeat gene deleted in velocardiofacial syndrome              | A member of the catenin family, encodes a protein containing a coiled coil domain and an armadillo repeat sequence as well as a predicted nuclear-targeting sequence.                    | Yes                                         | Yes (11)                                        |                                                                                                                                                                                  |
| <i>C22orf25</i>          | Chromosome 22 open reading frame 25                                     | n/a                                                                                                                                                                                      | Yes                                         |                                                 |                                                                                                                                                                                  |
| <i>DGCR8</i>             | DiGeorge syndrome critical region gene 8                                | Encodes for a component of the "microprocessor", a nuclear complex involved in microRNA processing.                                                                                      | Yes                                         |                                                 | Embryonic lethality before somite formation, abnormal dendrite morphology, abnormal spatial working memory, decreased prepulse inhibition.                                       |
| <i>TRMT2A</i>            | Trimethyllysine methyltransferase 2                                     | Encodes a protein that binds to RAN complexed with GTP but not GDP and markedly increase GTP hydrolysis by the RanGTPase-activating protein (RanGAP1).                                   | Yes                                         |                                                 |                                                                                                                                                                                  |
| <i>RANBP1</i>            | Ran binding protein 1                                                   | Encodes a protein that binds to RAN complexed with GTP but not GDP and markedly increase GTP hydrolysis by the RanGTPase-activating protein (RanGAP1).                                   | Yes                                         |                                                 |                                                                                                                                                                                  |
| <i>ZDHHC8</i>            | Zinc finger, dhhc-type containing 8                                     | Member of the DHHC family of palmitoyl-transferases                                                                                                                                      | Yes                                         | Yes (12, 13)                                    | Decreased exploration in new environment, reduced prepulse inhibition, abnormal dendrite and spine morphology.                                                                   |
| <i>LOC15197</i>          | n/a                                                                     | n/a                                                                                                                                                                                      |                                             |                                                 |                                                                                                                                                                                  |
| <i>RTN4R</i>             | Reticulon 4 receptor                                                    | Encodes the receptor for reticulon 4. It mediates axonal growth inhibition; may play a role in axonal plasticity in the adult CNS.                                                       | Yes                                         | Yes (12)                                        | Hypoactivity, impaired coordination, decreased exploration in new environment, abnormal central nervous system regeneration, axon outgrowth and plasticity.                      |
| <i>DGCR6L</i>            | DiGeorge syndrome critical region gene 6-like                           | One of two genes encoding nearly identical proteins with similar expression patterns.                                                                                                    |                                             |                                                 |                                                                                                                                                                                  |
| <i>PHKAP1</i>            | n/a                                                                     | n/a                                                                                                                                                                                      |                                             |                                                 |                                                                                                                                                                                  |
| <i>RIMBP3</i>            | Dktzp434h735 protein                                                    | n/a                                                                                                                                                                                      |                                             |                                                 |                                                                                                                                                                                  |
| <i>ZNF74</i>             | Zinc finger protein 74 (cos2)                                           | Encodes a putative transcription factor with 12 zinc finger motifs of the Kruppel/TEFIIA type.                                                                                           |                                             | Yes (14)                                        |                                                                                                                                                                                  |
| <i>SCARF2</i>            | Scavenger receptor class f, member 2                                    | Similar to SCARF1/SREC-1, a scavenger receptor protein that mediates the binding and degradation of acetylated low density lipoprotein (Ac-LDL).                                         |                                             |                                                 |                                                                                                                                                                                  |
| <i>KLHL22</i>            | Kelch-like 22 (drosophila)                                              | n/a                                                                                                                                                                                      |                                             |                                                 |                                                                                                                                                                                  |
| <i>MED15</i>             | Trinucleotide repeat containing 7                                       | May function as a transcriptional coactivator in RNA polymerase II transcription.                                                                                                        | Yes                                         |                                                 |                                                                                                                                                                                  |
| <i>POM121LAP</i>         | Pom121 membrane glycoprotein-like 4 pseudogene (rat)                    | n/a                                                                                                                                                                                      |                                             |                                                 |                                                                                                                                                                                  |
| <i>TMEM191A</i>          | Hypothetical protein dktzp434n35                                        | n/a                                                                                                                                                                                      |                                             |                                                 |                                                                                                                                                                                  |
| <i>PI4KA</i>             | Phosphatidylinositol 4-kinase, catalytic, alpha polypeptide             | Encodes a phosphatidylinositol (PI) 4-kinase which catalyzes the first committed step in the biosynthesis of phosphatidylinositol 4,5-bisphosphate.                                      |                                             | Yes (15)                                        |                                                                                                                                                                                  |
| <i>SERPIND1</i>          | Serp1n peptidase inhibitor, clade d (heparin cofactor), member 1        | Encodes serine proteinase inhibitor.                                                                                                                                                     |                                             |                                                 |                                                                                                                                                                                  |
| <i>SNAP29</i>            | Synaptosomal-associated protein, 29kDa                                  | A member of the SNAP25 gene family, encodes a protein involved in multiple membrane trafficking steps.                                                                                   |                                             | Yes (16)                                        |                                                                                                                                                                                  |
| <i>CRKL</i>              | v-crk sarcoma virus ct1 oncogene homolog (avian)-like                   | Encodes a protein kinase containing SH2 and SH3 (src homology). May be involved in the Reelin pathway.                                                                                   | Yes                                         |                                                 | Double <i>Crk</i> and <i>Crkl</i> conditional KOs show impaired cerebellar foliation, Purkinje cell migration, dendrite development, and disruption of cortical layer formation. |
| <i>AIFM3</i>             | Apoptosis-inducing factor like                                          | n/a                                                                                                                                                                                      |                                             |                                                 |                                                                                                                                                                                  |
| <i>LZTR1</i>             | Leucine-zipper transcription regulator 1                                | Encodes a member of the BTB-kelch superfamily, localized exclusively to the Golgi network.                                                                                               | Yes                                         |                                                 |                                                                                                                                                                                  |
| <i>THAP7</i>             | THAP domain containing 7                                                | n/a                                                                                                                                                                                      |                                             |                                                 |                                                                                                                                                                                  |
| <i>FLJ39582</i>          | Hypothetical protein flj39582                                           | n/a                                                                                                                                                                                      |                                             |                                                 |                                                                                                                                                                                  |
| <i>MGC1673</i>           | n/a                                                                     | n/a                                                                                                                                                                                      |                                             |                                                 |                                                                                                                                                                                  |
| <i>P2RX6</i>             | Purinergic receptor P2X, ligand-gated ion channel, 6                    | The protein encoded by this gene belongs to the family of P2X receptors, ATP-gated ion channels.                                                                                         |                                             |                                                 |                                                                                                                                                                                  |
| <i>SLC7A4</i>            | Solute carrier family 7 (cationic amino acid transporter), member 4     | n/a                                                                                                                                                                                      |                                             |                                                 |                                                                                                                                                                                  |
| <i>P2RX6P</i>            | n/a                                                                     | n/a                                                                                                                                                                                      |                                             |                                                 |                                                                                                                                                                                  |
| <i>LOC4891</i>           | Similar to chromosome 14 open reading frame 166b                        | n/a                                                                                                                                                                                      |                                             |                                                 |                                                                                                                                                                                  |
| <i>POM121L8P</i>         | n/a                                                                     | n/a                                                                                                                                                                                      |                                             |                                                 |                                                                                                                                                                                  |
| <i>RIMBP3C</i>           | RIMS binding protein 3C                                                 | n/a                                                                                                                                                                                      |                                             |                                                 |                                                                                                                                                                                  |
| <i>RIMBP3B</i>           | RIMS binding protein 3B                                                 | n/a                                                                                                                                                                                      |                                             |                                                 |                                                                                                                                                                                  |

a. Patients with typical 3-Mb deletions that are indistinguishable by FISH analysis may exhibit differences of up to 200 Kb on each side of the breakpoint by higher resolution approaches. Since these differences can affect one or more known and predicted genes at each end, the exact complement of deleted genes may be different in each carrier.  
b. The first 35 RefSeq genes listed (*DGCR6-DGCR6L*) map within the 1.5-Mb region of the deletion.  
c. Experimental evidence was determined according to <http://www.informatics.jax.org/expression.shtml>  
d. The original reference is only cited; detailed account of follow-up studies can be found at [www.schizophreniagenet.org](http://www.schizophreniagenet.org)  
e. Italic text indicates phenotypes derived from homozygous knockout mice only.

**References:**

1. Liu, H. *et al.* Genetic variation at the 22q11 PRODH2/DGCR6 locus presents an unusual pattern and increases susceptibility to schizophrenia. *Proc. Natl Acad. Sci. USA* **99**, 3717–3722 (2002).
2. Jacquet, H. *et al.* PRODH mutations and hyperprolinemia in a subset of schizophrenic patients. *Hum. Mol. Genet.* **11**, 2243–2249 (2002).
3. Shifman, S. *et al.* A complete genetic association scan of the 22q11 deletion region and functional evidence reveal an association between DGCR2 and schizophrenia. *Hum. Genet.* **120**, 160–170 (2006).
4. Wang, H. *et al.* Transmission disequilibrium test provides evidence of association between promoter polymorphisms in 22q11 gene DGCR14 and schizophrenia. *J. Neural Transm.* **113**, 1551–1561 (2006).
5. De Luca, A. *et al.* Association study of a promoter polymorphism of UFD1L gene with schizophrenia. *Am. J. Med. Genet.* **105**, 529–533 (2001).
6. Sun, Z. Y., *et al.* The CLDN5 locus may be involved in the vulnerability to schizophrenia. *Eur. Psychiatry* **19**, 354–357 (2004).
7. Williams, N. M. *et al.* Strong evidence that GNB1L is associated with schizophrenia. *Hum. Mol. Genet.* **17**, 555–566 (2008).
8. Karayiorgou, M. *et al.* Genotype determining low catechol-O-methyltransferase activity as a risk factor for obsessive-compulsive disorder. *Proc. Natl Acad. Sci. USA* **94**, 4572–4575 (1997).
9. Li, T., *et al.* Preferential transmission of the high activity allele of COMT in schizophrenia. *Psychiatr. Genet.* **6**, 131–133 (1996).
10. Egan, M. F., *et al.* Effect of COMT Val108/158 Met genotype on frontal lobe function and risk for schizophrenia. *Proc. Natl Acad. Sci. USA* **98**, 6917–6922 (2001).
11. Sanders, A.R., *et al.* Haplotypic association spanning the 22q11.21 genes COMT and ARVCF with schizophrenia. *Mol. Psychiatry* **10**, 353–365 (2005).
12. Liu, H. *et al.* Genetic variation in the 22q11 locus and susceptibility to schizophrenia. *Proc. Natl Acad. Sci. USA* **26**, 16859–16864 (2002).
13. Mukai, J. *et al.* Evidence that the gene encoding ZDHHC8 contributes to the risk of schizophrenia. *Nature Genet.* **36**, 725–731 (2004).
14. Takase, K., *et al.* Association of ZNF74 gene genotypes with age-at-onset of schizophrenia. *Schizophr. Res.* **52**, 161–165 (2001).
15. Vorstman, J. A., *et al.* Association of the PIK4CA schizophrenia-susceptibility gene in adults with the 22q11.2 deletion syndrome. *Am. J. Med. Genet. B Neuropsychiatr. Genet.* **150B**, 430–433 (2009).
16. Saito, T., *et al.* Polymorphism in SNAP29 gene promoter region associated with schizophrenia. *Mol. Psychiatry* **6**, 193–201 (2001). Erratum in: *Mol. Psychiatry* **6**, 605 (2001).
