# Supplementary material
Source: PubMed Central journal article supplement (PMC2977984)
Supplement: NIHMS218108-supplement-Supplementary_data2.pdf [file NIHMS218108-supplement-Supplementary_data2.pdf]

## Supplementary information S2 | DTI results from children with 22q11.2DS

| <i>Study</i>                       | <i>X</i>  | <i>Y</i>   | <i>Z</i> | <i>Voxels</i> | <i>Voxel Size</i> |
|------------------------------------|-----------|------------|----------|---------------|-------------------|
| Barnea-Goraly <i>et al.</i> , 2003 | -16<br>14 | -52<br>-50 | 14<br>29 | 193<br>165    | 1.9x1.9x5mm       |
| Simon <i>et al.</i> , 2005         | -14<br>8  | -47<br>-47 | 26<br>26 | 2802          | 2x2x2 mm          |
| Simon <i>et al.</i> , 2008         | -37<br>40 | -48<br>-41 | 20<br>28 | 87<br>185     | 2x2x2 mm          |

Peaks of significant clusters in Talairach Coordinates of higher FA values in 22q11.2DS vs. Typical groups for three studies as depicted in Figure 2. (Note that peaks in the Simon *et al.*, 2005 study are components of a single, large cluster).

## References:

1. Barnea-Goraly, N. *et al.* Investigation of white matter structure in velocardiofacial syndrome: A diffusion tensor imaging study. *Am. J. Psychiatry* **160**, 1863–1869 (2003).
2. Simon, T. J. *et al.* Volumetric, connective, and morphologic changes in the brains of children with chromosome 22q11.2 deletion syndrome: an integrative study. *Neuroimage* **25**, 169–180 (2005).
3. Simon, T. J. *et al.* Atypical cortical connectivity and visuospatial cognitive impairments are related in children with chromosome 22q11.2 deletion syndrome. *Behav. Brain Funct.* **4**, 25 (2008).
